1 **Running Title:** Seroprevalence of SARS-CoV-2 in Baton Rouge

2 **Keywords:** SARS Virus, COVID-19, Cross-Sectional Studies, Healthcare Disparities, Prevalence,  
3 Seroepidemiologic Studies, Baton Rouge, Convalescence

4 **Title:** Racial and workplace disparities in seroprevalence of SARS-CoV-2 in Baton Rouge, Louisiana,  
5 July 15-31, 2020

6 **Authors:** Amy K. Feehan, PhD, Cruz Velasco, PhD, Daniel Fort, PhD, Jeffrey H. Burton, PhD, Eboni  
7 Price-Haywood, MD, Peter T. Katzmarzyk, PhD, Julia Garcia-Diaz, MD, Leonardo Seoane, MD

8 **Affiliations:**

9 Ochsner Clinic Foundation, New Orleans, LA, USA (A. K. Feehan, C. Velasco, D. Fort, J. H. Burton, E.  
10 Price-Haywood, J. Garcia-Diaz, L. Seoane)

11 The University of Queensland Faculty of Medicine, Ochsner Clinical School, New Orleans, LA, USA (A.  
12 K. Feehan, J. Garcia-Diaz, E. Price-Haywood, L. Seoane)

13 Pennington Biomedical Research Center, Louisiana State University, Baton Rouge, LA, USA (P. T.  
14 Katzmarzyk)

15 Louisiana State University Health Sciences Center-Shreveport, Shreveport, LA, USA (L. Seoane)

16

17

18

19

20

21

## 22 **Abstract**

23 Using paired molecular and antibody testing for SARS-CoV-2 infection, we determined point  
24 prevalence and seroprevalence in a municipality in Louisiana, USA during the second phase of reopening.  
25 Infections were highly variable by race, work environment, and ZIP code. Census-weighted  
26 seroprevalence and point prevalence were 3.6% and 3.0%, respectively.

## 27 **Text**

28 Previously we reported results from a seroprevalence study conducted in New Orleans, Louisiana,  
29 USA, hit hard early in the COVID-19 pandemic (1). Baton Rouge is a large metropolitan area roughly 80  
30 miles northwest of New Orleans and at the time of this study was in the second phase of reopening  
31 following a stay-at-home order. While the seroprevalence in New Orleans (6.9%)(1) was similar to  
32 prevalence recorded in Spain (5%), Sao Paulo, Brazil (4.7%) and New York, USA (6.9%) (2,3,4), Baton  
33 Rouge had only 3,427 more cases as of August 2, 2020 (17,093 cases) than New Orleans did by May 16,  
34 2020 (13,666 cases) (5). This study was designed to estimate SARS-CoV-2 infections in the greater Baton  
35 Rouge area (Ascension, East Baton Rouge, Livingston, and West Baton Rouge Parishes) with additional  
36 information on potential workplace exposures.

37 The protocol was approved by the Ochsner IRB and intended to enroll and test up to 2,500  
38 participants at 13 sites throughout Baton Rouge between July 15-31. Recruitment targeted a  
39 representative sample in a method developed by Public Democracy ([www.publicdemocracy.io](http://www.publicdemocracy.io)) and  
40 described elsewhere (1,6). In contrast to the New Orleans study, where people tested were under a “stay-  
41 at-home” order, Baton Rouge was in phase two of reopening. A randomized subset of 500,000 Baton  
42 Rouge residents was targeted with digital ads for recruitment. From those, 3,687 volunteers were  
43 recruited and re-stratified by census designations: 2,309 were invited, 2,179 were enrolled and completed  
44 testing, and 2,138 were included in the final analysis. Thirty-eight subjects were excluded for living in  
45 ineligible ZIP codes and 3 withdrew consent (Supplemental Figure 1). All study materials were in

46 English, Spanish, and Vietnamese. Participants were offered free transportation. Research staff verbally  
47 consented subjects and electronically documented consent and survey responses. Subjects then had a  
48 blood draw and nasopharyngeal (NP) swab performed.

49 US Food and Drug Administration-Emergency Use Authorization approved tests were used.  
50 Real-time reverse transcriptase polymerase chain reaction (PCR) tests of NP swabs were performed on  
51 the Abbott m2000 RealTime system. Qualitative immunoglobulin G (IgG) blood tests were performed on  
52 the ARCHITECT i2000SR. The IgG test meets criteria described by the CDC to yield high positive  
53 predictive value, which was validated by Ochsner Health laboratory and by others (7,8). Study  
54 participants with either or both positive tests were assessed as having been infected with SARS-CoV-2.  
55 Point estimates and corresponding 95% confidence intervals (CI) for proportions of COVID-19 exposure  
56 (PCR+ and/or IgG+ tests), point prevalence (PCR+, IgG-), and seroprevalence (IgG+ tests regardless of  
57 PCR test) were estimated for the Baton Rouge area using raw and census-weighted counts. Unadjusted  
58 odds ratios with Firth correction were calculated for all variables.

59 The sample was 63.6% female, 66.9% white, average age of 48.7 years, and average household  
60 size of 2.84 people. The census-weighted SARS-CoV-2 infections in the sample is 6.6% (6.0%, raw) with  
61 3.0% positive for active viral shedding without detectable antibody, which translates to 16,536 contagious  
62 individuals. By race, seroprevalence was highest (7.5%) in Black subjects which was higher than any  
63 other group: White non-Hispanic (1.8%), Asian non-Hispanic (1.7%), Hispanic of any race (1.6%) and  
64 Other (2.7%). Sample breakdown and population estimates for adults over 18 years old are provided in  
65 Table 1 along with raw and weighted exposure, weighted point prevalence, and weighted seroprevalence.

66 The point prevalence and any SARS-CoV-2 infection are listed and mapped by ZIP codes across  
67 the greater Baton Rouge area (Supplemental Figure 2). Point prevalence and all infections were highly  
68 variable by ZIP.

69 Marital status was associated with prevalence ( $p=0.0005$ ). Single individuals were the most  
70 infected (9.3%) compared with married or cohabitating subjects (5.0%) and were 1.9 times more likely to  
71 test positive (Figure 1). Work environment was also associated with prevalence ( $p=0.01$ ) with the lowest  
72 prevalence in the group who worked from home (WFH) part time and went in to work part time (3.7%).  
73 Those who were mostly going into work had the highest prevalence (8.2%) and were 2.3 times more  
74 likely to test positive than those who WFH part time. Infections varied by type of job reported ( $p=0.01$ )  
75 with the lowest positivity in office workers (3.0%) and increased odds of testing positive in public,  
76 delivery, healthcare and other jobs. However, based on seroprevalence, which was also significantly  
77 different by job type ( $p=0.03$ ), healthcare workers and public-facing workers bore the brunt of early  
78 infections shown by the higher odds of testing antibody-positive (Figure 1).

79 This study found the prevalence of SARS-CoV-2 infection in Baton Rouge to be 6.6%, but was  
80 heavily concentrated on new, contagious infections (3.0%). There is a chance that those infected very  
81 early on no longer had antibodies. This differed from the New Orleans study performed after extensive  
82 lockdowns with 0.9% new infections (1). Some populations had higher rates of infection than others,  
83 including Black and Hispanic communities and public-facing workers or those who do not WFH.

#### 84 **Acknowledgments**

85 The authors would like to especially thank the labs at the Ochsner Medical Center Jefferson  
86 Highway Campus for testing and keeping track of research samples; Christy Reeves for liaising with  
87 public leaders and sites; Eric Sapp and Dan Nichols from Public Democracy for their recruitment effort;  
88 Susan Green, Charlene Ho, Lena Hooper, Patty Kline, and Candace Melancon for clinical site  
89 management; Johanna Veal, Lyndsey Buckner-Baiamonte, Ansley Hammons, and Ashley LaRoche for  
90 research site management; and countless research coordinators, clinical staff, marketing personnel,  
91 medical students, and Epic and IT staff for making site testing possible. The Ochsner Health Market  
92 Planning and Analysis team designed the maps in supplemental Figure 1. The authors thank Kathleen  
93 McFadden for her thorough editing. We would like to thank the Ochsner Language Services Department

94 for helping to increase inclusivity. We would also like to acknowledge the East Baton Rouge Mayor-  
95 President Sharon Weston Broome and Pennington Biomedical Research Center for their collaboration and  
96 support of this project.

## 97 **Funding**

98 The study was funded by the Baton Rouge Area Foundation, Louisiana COVID-19 Health Equity Task  
99 Force, and The Humana Foundation, with additional support from The Blue Cross and Blue Shield of  
100 Louisiana Foundation, Healthy Blue, the Huey and Angelina Wilson Foundation, and the Irene W. and  
101 C.B. Pennington Foundation.

102 The funders had no role in study design, data collection and analysis, decision to publish, or preparation  
103 of the manuscript.

## 104 **References**

- 105 1. Feehan AK, Fort D, Garcia-Diaz J, Price-Haywood E, Velasco C, Sapp E, et al. Seroprevalence  
106 of SARS-CoV-2 and infection fatality ratio, Orleans and Jefferson parishes, Louisiana, USA,  
107 May 2020. *Emerg Infect Dis.* 2020 Nov [Aug 2020]. <https://doi.org/10.3201/eid2611.203029>
- 108 2. Pollán M, Pérez-Gómez B, Pastor-Barriuso R, et al. Prevalence of SARS-CoV-2 in Spain (ENE-  
109 COVID): a nationwide, population-based seroepidemiological study [published online ahead of  
110 print, 2020 Jul 6]. *Lancet.* 2020;doi:10.1016/S0140-6736(20)31483-5
- 111 3. Tess BH, Granato CFH, Alves MCGP, et al. SARS-CoV-2 seroprevalence in the municipality of  
112 Sao Paulo, Brazil, ten weeks after the first reported case. *medRxiv.* 2020:2020.06.29.20142331.  
113 doi:10.1101/2020.06.29.20142331

- 114 4. Havers FP, Reed C, Lim T, et al. Seroprevalence of Antibodies to SARS-CoV-2 in 10 Sites in the  
115 United States, March 23-May 12, 2020. JAMA Intern Med. Jul 21  
116 2020;doi:10.1001/jamainternmed.2020.4130
- 117 5. Louisiana Coronavirus (COVID-19) Information. Louisiana Department of Public Health; 2020.  
118 <http://ldh.la.gov/Coronavirus/>
- 119 6. Feehan A, Fort D, Garcia-Diaz J, Price-Haywood E, Velasco C, Sapp E, et al. Frequency of  
120 Symptoms and Asymptomatic SARS-CoV-2 Infection in New Orleans, Louisiana after 7 Weeks  
121 of a Stay-at-Home Order (6/18/2020). Available at SSRN: <https://ssrn.com/abstract=3633166>
- 122 7. Interim Guidelines for COVID-19 Antibody Testing. Centers for Disease Control and Prevention;  
123 2020. <https://www.cdc.gov/coronavirus/2019-ncov/lab/resources/antibody-tests-guidelines.html>
- 124 8. Bryan A, Pepper G, Wener MH, Fink SL, Morishima C, Chaudhary A, et al. Performance  
125 characteristics of the Abbott Architect SARS-CoV-2 IgG assay and seroprevalence in Boise,  
126 Idaho. J Clin Microbiol. 2020;JCM.00941-20. doi:10.1128/jcm.00941-20
- 127 Supplementary Figure 1. Flow diagram of recruitment to enrollment and analysis.
- 128 Supplementary Figure 2. Heatmaps of the Greater Baton Rouge Area (Ascension, East Baton Rouge,  
129 West Baton Rouge, and Livingston parishes) showing (top) active infections and (bottom) any  
130 infections by ZIP code. Number of participants, positives and percentages are listed by ZIP on the  
131 right.
- 132

Table 1. Prevalence of SARS-CoV-2 past and present infections by race and ethnicity across Baton Rouge, LA after phased reopening.

|                                 | Positive, no./total no. (% of sample) | BR residents 18+,* no. (% of population) | Raw any infection,‡ % (95% CI) | Weighted, any infection,§ % (95% CI) | Weighted point prevalence,¶ % (95% CI) | Weighted seroprevalence,# % (95% CI) |
|---------------------------------|---------------------------------------|------------------------------------------|--------------------------------|--------------------------------------|----------------------------------------|--------------------------------------|
| <b>Total</b>                    | 128/2138 (100%)                       | 551,185 (100%)                           | 6.0% (5.0,7.1)                 | 6.6% (5.7,7.7)                       | 3.0% (2.3,3.7)                         | 3.6% (2.8,4.4)                       |
| White Alone                     | 55/1431 (66.9%)                       | 332,445 (60.3%)                          | 3.8% (2.9,4.9)                 | 4.2% (3.2,5.2)                       | 2.4% (1.6,3.2)                         | 1.8% (1.1,2.5)                       |
| Black or African American Alone | 57/516 (24.1%)                        | 177,950 (32.3%)                          | 11.0% (8.5,14.1)               | 11.0% (8.5,14.1)                     | 3.5% (1.9,5.1)                         | 7.5% (5.2,9.8)                       |
| Asian Alone                     | 2/59 (3.4%)                           | 13,630 (2.5%)                            | 3.4% (0.4,11.7)                | 3.5% (0.8,2)                         | 1.7% (0.9,1)                           | 1.7% (0.9,1)                         |
| Other^^:                        | 1/28 (1.3%)                           | 7,025 (1.3%)                             | 3.6% (0.1,18.4)                | 2.7% (0.8,7)                         | 0.0%                                   | 2.7% (0.8,7)                         |
| Hispanic or Latino (any race)   | 14/104 (4.9%)                         | 20,125 (3.7%)                            | 13.5% (7.6,21.6)               | 11.8% (5.6,18.0)                     | 10.1% (4.3,15.9)                       | 1.6% (0.4,0)                         |

\*Census 2018 population estimates. By August 2nd, a total of 17,093 state-aggregated, confirmed cases had been reported in Ascension, East Baton Rouge, Livingston, and West Baton Rouge parishes (5). SARS-CoV-2, severe acute respiratory syndrome coronavirus 2

‡Percentage of the sample with a PCR-positive test, an IgG-positive test, or both.

§Census-weighted percentage of a PCR-positive test, an IgG-positive test, or both calculated to match 2018 racial demographics by parish and then combined.

¶Census-weighted percentage of PCR-positive and IgG-negative tests calculated to match 2018 racial demographics by parish and then combined.

#Census-weighted percentage of IgG-positive tests calculated to match 2018 racial demographics by Parish and then combined.

\*\*Number of residents multiplied by weighted point prevalence (PCR-positive tests).

^^Other includes American Indian or Alaska Native, Pacific Islander, and multi-racial individuals.

Figure 1. Odds ratios of SARS-Cov-2 infections by marital status, work environment, and job type in Baton Rouge, LA, after phased reopening.

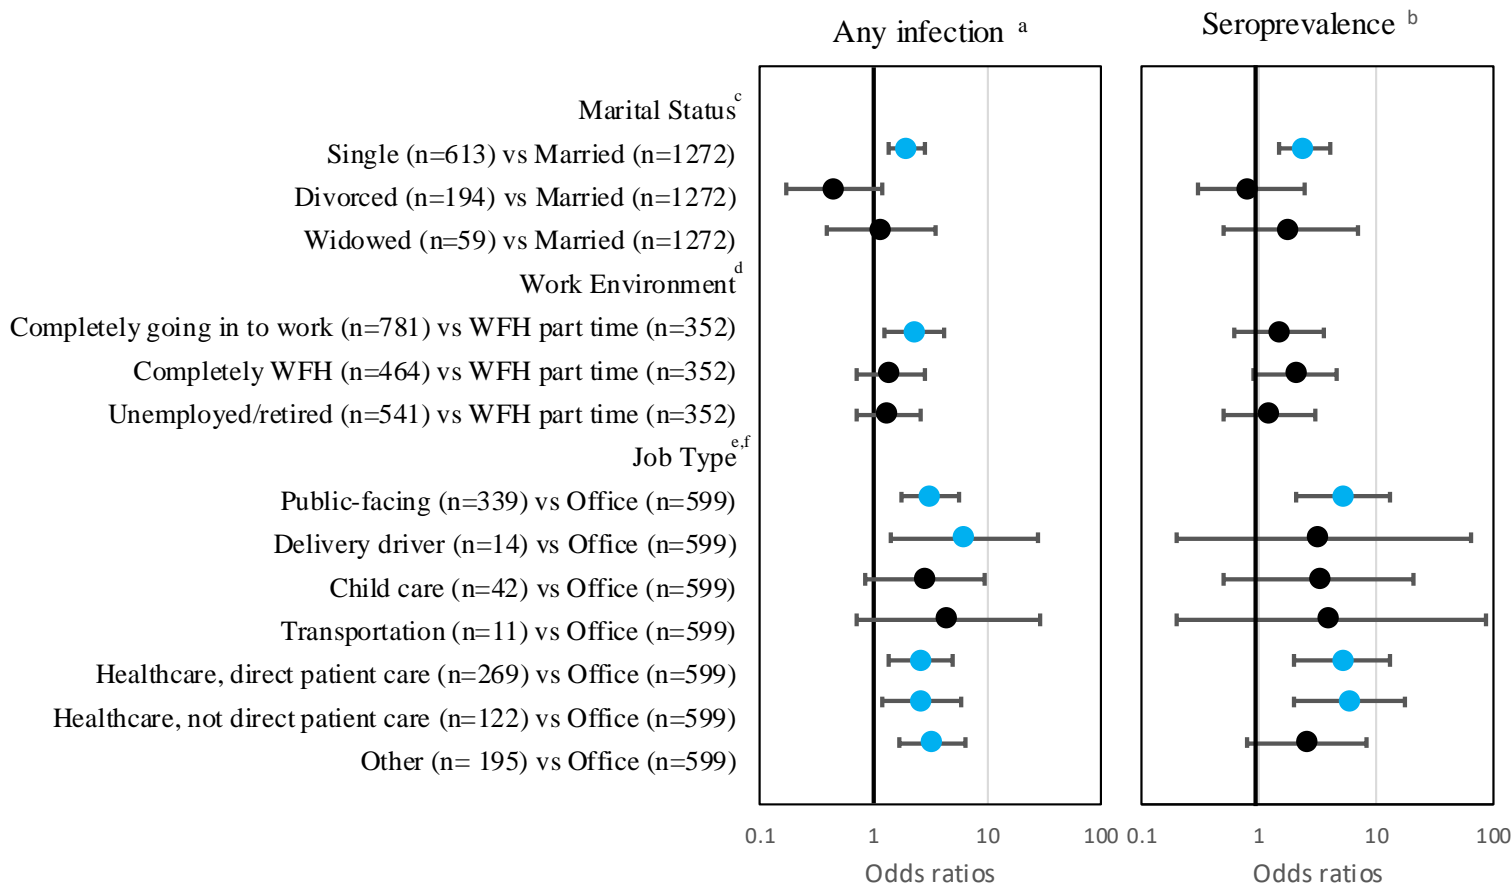

Odds ratios from unweighted logistic regression without covariates with Firth correction shown with 95% confidence intervals. Reference categories percent positivity are Married (5.0% any infection, 2.3% seroprevalence), WFH part time (3.7% any infection, 2.0% seroprevalence) and Office workers (3.0% any infection, 1.0% seroprevalence). SARS-CoV-2, severe acute respiratory syndrome coronavirus 2; WFH, work from home.

<sup>a</sup> Percentage and odds ratios of any positive test (PCR+ and/or IgG+)

<sup>b</sup> Percentage and odds ratios of late stage or past infections (IgG+, regardless of PCR status)

<sup>c</sup> Odds of any infection ( $p=0.0005$ ) and seroprevalence ( $p=0.003$ ) differ by marital status.

<sup>d</sup> Odds of any infection ( $p=0.01$ ) differ by work environment.

<sup>e</sup> Odds of any infection ( $p=0.01$ ) and seroprevalence ( $p=0.03$ ) differ by job type.

<sup>f</sup> Six people did not give an answer for “Job Type” and none of them tested positive on any test.

Unemployed/retired people ( $n=541$ ) are not included in this category.



Supplemental Figure 1. Flow diagram of recruitment to enrollment and analysis.

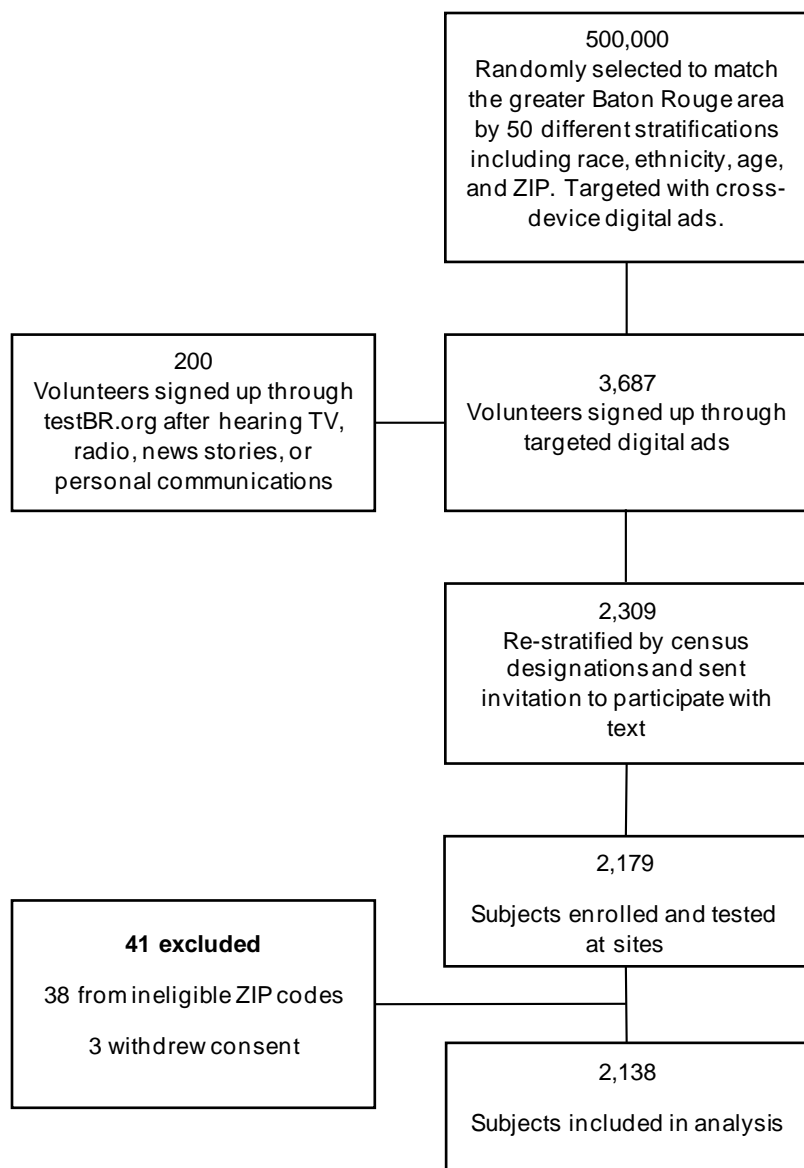

Supplementary Figure 2. Heatmaps of the Greater Baton Rouge Area

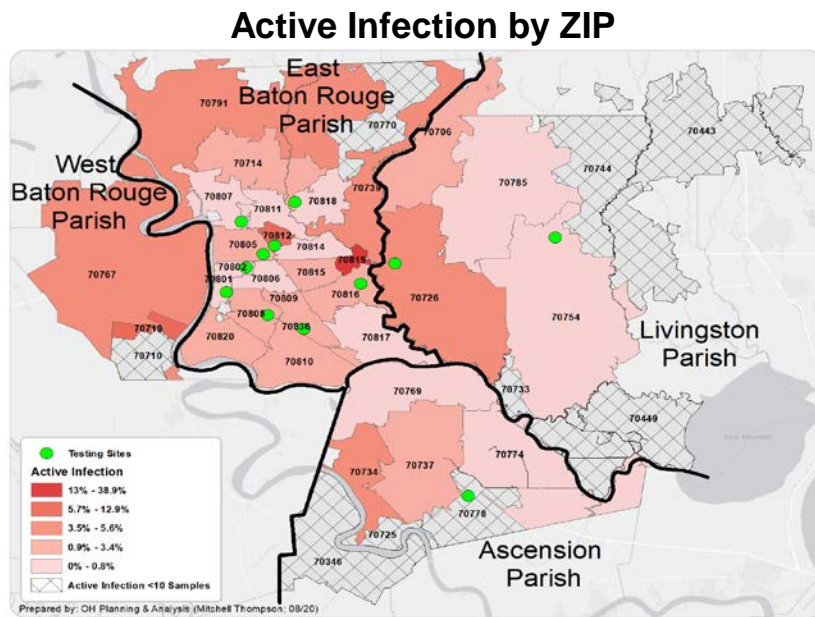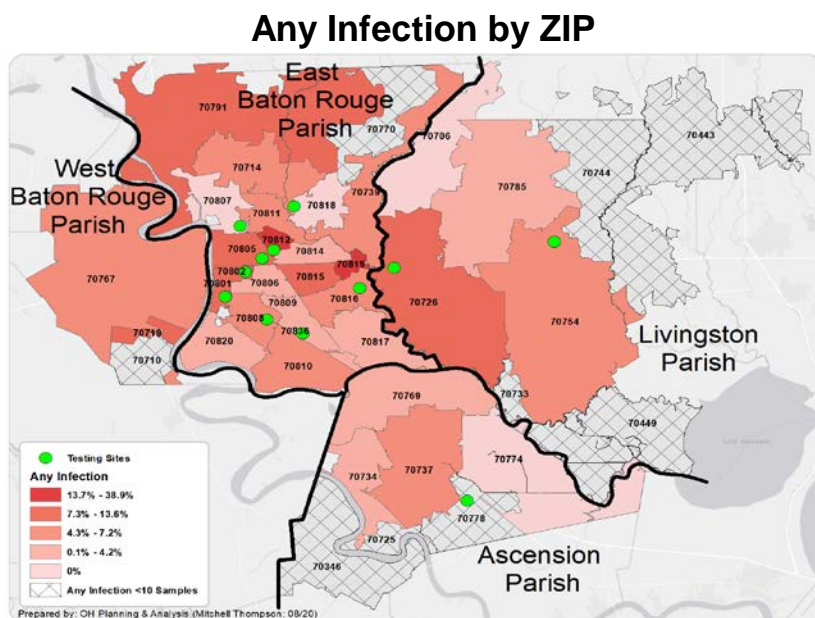

| ZIP   | N   | Active Infection (%) | Any infection (%) |
|-------|-----|----------------------|-------------------|
| 70808 | 228 | 6 (2.6%)             | 12 (5.3%)         |
| 70726 | 198 | 11 (5.6%)            | 18 (9.1%)         |
| 70810 | 178 | 5 (2.8%)             | 8 (4.5%)          |
| 70816 | 152 | 5 (3.3%)             | 11 (7.2%)         |
| 70817 | 152 | 1 (0.7%)             | 4 (2.6%)          |
| 70806 | 146 | 1 (0.7%)             | 4 (2.7%)          |
| 70769 | 130 | 1 (0.8%)             | 5 (3.8%)          |
| 70809 | 99  | 2 (2.0%)             | 4 (4.0%)          |
| 70737 | 89  | 3 (3.4%)             | 5 (5.6%)          |
| 70815 | 74  | 2 (2.7%)             | 6 (8.1%)          |
| 70706 | 62  | 2 (3.2%)             | 0 (0%)            |
| 70802 | 56  | 0 (0%)               | 5 (8.9%)          |
| 70791 | 52  | 2 (3.8%)             | 4 (7.7%)          |
| 70739 | 50  | 2 (4.0%)             | 3 (6.0%)          |
| 70820 | 49  | 1 (2.0%)             | 1 (2.0%)          |
| 70814 | 46  | 0 (0%)               | 1 (2.2%)          |
| 70805 | 44  | 1 (2.3%)             | 6 (13.6%)         |
| 70818 | 40  | 0 (0%)               | 0 (0%)            |
| 70785 | 39  | 0 (0%)               | 1 (2.6%)          |
| 70714 | 38  | 1 (2.6%)             | 2 (5.3%)          |
| 70812 | 31  | 4 (12.9%)            | 9 (29.0%)         |
| 70734 | 24  | 1 (4.2%)             | 1 (4.2%)          |
| 70767 | 19  | 1 (5.3%)             | 1 (5.3%)          |
| 70811 | 18  | 0 (0%)               | 1 (5.6%)          |
| 70819 | 18  | 7 (38.9%)            | 7 (38.9%)         |
| 70754 | 16  | 0 (0%)               | 1 (6.3%)          |
| 70807 | 14  | 0 (0%)               | 0 (0%)            |
| 70719 | 11  | 1 (9.1%)             | 1 (9.1%)          |
| 70774 | 10  | 0 (0%)               | 0 (0%)            |
| 70710 | 8   | 0 (0%)               | 0 (0%)            |
| 70733 | 8   | 1 (12.5%)            | 1 (12.5%)         |
| 70836 | 7   | 0 (0%)               | 1 (14.3%)         |
| 70744 | 5   | 0 (0%)               | 0 (0%)            |
| 70346 | 4   | 0 (0%)               | 0 (0%)            |
| 70725 | 4   | 0 (0%)               | 2 (50.0%)         |
| 70770 | 4   | 0 (0%)               | 0 (0%)            |
| 70801 | 4   | 0 (0%)               | 0 (0%)            |
| 70778 | 3   | 0 (0%)               | 0 (0%)            |
| 70821 | 2   | 0 (0%)               | 0 (0%)            |
| 70443 | 1   | 0 (0%)               | 0 (0%)            |
| 70449 | 1   | 0 (0%)               | 0 (0%)            |
| 70707 | 1   | 0 (0%)               | 0 (0%)            |
| 70727 | 1   | 1 (100%)             | 1 (100%)          |

Supplementary Figure 2. Heatmaps of the Greater Baton Rouge Area (Ascension, East Baton Rouge, West Baton Rouge, and Livingston parishes) showing (top) active infections and (bottom) any infections by ZIP code. Number of participants, positives and percentages are listed by ZIP on the right.
